# Supplementary material for: Accumulation of Cytochrome b558 at the Plasma Membrane: Hallmark of Oxidative Stress in Phagocytic Cells
Source: MDPI journal article supplement (doi:10.3390/ijms23020767), 2022-01-11
Supplement: s1 [file s1]

## Supplementary material

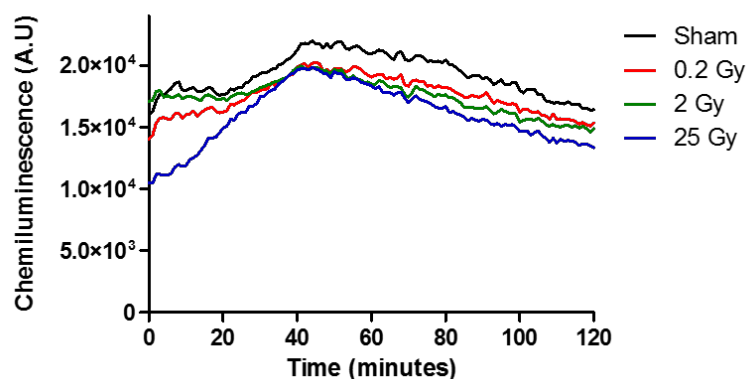

**Figure S1. Chemiluminescence plot generated by unstimulated PLB-985 cells.** ROS produced by PLB-985 cells after irradiations were detected using chemiluminescence during 2 hours by the reaction of HRP and luminol base L-012

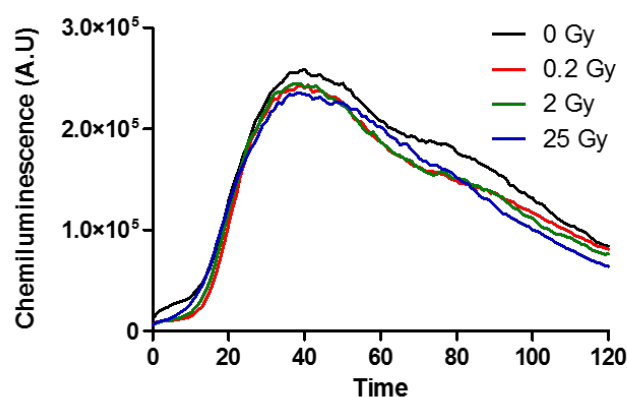

**Figure S2. Chemiluminescence plot generated by phagocytosing PLB-985 cells.** ROS produced by PLB-985 cells after irradiations were detected using chemiluminescence during 2 hours by the reaction of HRP and luminol base L-012

**Table S1. Doses, dose rates and the total amount of OH radicals generated**

| Dose rate (Gy/min) | Irradiation time (min) | Dose received (Gy) | Total amount of OH radicals |
|--------------------|------------------------|--------------------|-----------------------------|
| 0.2                | 1                      | 0.2                | 56 nM                       |
| 0.2                | 10                     | 2                  | 5.6 $\mu$ M                 |
| 21.5               | 1.2                    | 25.8               | 72 $\mu$ M                  |
